# Supplementary material for: High-Resolution CT Findings as Predictive Factors for Recurrent Nontuberculous Mycobacterial Pulmonary Disease after Successful Treatment
Source: PubMed Central journal article supplement (PMC7825014; doi:10.3390/jcm10020172), 2021-01-06
Supplement: jcm-10-00172-s001.pdf [file jcm-10-00172-s001.pdf]

## Electronic Supplementary Materials

**Table S1.** CT scoring system for the assessment of the extent of nontuberculous mycobacterial pulmonary disease

| CT findings                              | Score 0 | Score 1 | Score 2  | Score 3 |
|------------------------------------------|---------|---------|----------|---------|
| <b>Bronchiectasis (9 points)</b>         |         |         |          |         |
| Severity*                                | Absent  | Mild    | Moderate | Severe  |
| Extent†                                  | Absent  | 1–5     | 6–9      | > 9     |
| Mucus plugging†                          | Absent  | 1–5     | 6–9      | > 9     |
| <b>Cellular bronchiolitis (6 points)</b> |         |         |          |         |
| Severity‡                                | Absent  | Mild    | Moderate | Severe  |
| Extent‡                                  | Absent  | 1–5     | 6–9      | > 9     |
| <b>Cavity (9 points)</b>                 |         |         |          |         |
| Diameter (cm)                            | Absent  | < 3     | 3–5      | > 5     |
| Wall thickness (mm)                      | Absent  | < 1     | 1–5      | > 5     |
| Extent§                                  | Absent  | 1–3     | 4–5      | > 5     |
| Nodules (3 points)†                      | Absent  | 1–5     | 6–9      | > 9     |
| Consolidation (3 points)†                | Absent  | < 3     | 3–5      | > 5     |

\*Mild = bronchus diameter greater than the adjacent vessel diameter; moderate = bronchus diameter two to three times greater than the vessel diameter; severe = bronchus diameter three times greater than the vessel diameter

†Data are presented as the number of segments.

‡Mild = identifiable, peripheral lung < 1 cm from the pleura; moderate = definite, involvement greater than 1–3 cm from the pleura; severe = extensive, extension to the central lung

§Data are presented as the number of cavities.

CT, computed tomography

**Table S2.** Changes in isolated species in recurrent NTM-PD

| Initial isolated species       | Recurred isolated species | Number of patients |
|--------------------------------|---------------------------|--------------------|
| <i>M. avium</i> (n=9)          | <i>M. avium</i>           | 2                  |
|                                | <i>M. intracellulare</i>  | 4                  |
|                                | <i>M. abscessus</i>       | 1                  |
|                                | Mixed                     | 2                  |
| <i>M. intracellulare</i> (n=7) | <i>M. avium</i>           | 1                  |
|                                | <i>M. intracellulare</i>  | 3                  |
|                                | <i>M. abscessus</i>       | 3                  |
| <i>M. abscessus</i> (n=1)      | <i>M. abscessus</i>       | 1                  |
| <i>M. massiliense</i> (n=2)*   | <i>M. massiliense</i>     | 1                  |
|                                | Not available             | 1                  |

**Table S3.** Treatment regimen of NTM-PD in 44 patients

| Characteristics                                            | Non-recurrent<br>group<br>(n = 26) | Recurrent<br>group<br>(n = 18) |
|------------------------------------------------------------|------------------------------------|--------------------------------|
| M. avium complex (n = 31)                                  |                                    |                                |
| Macrolide + rifampin + ethambutol                          | 15                                 | 13                             |
| Macrolide + ethambutol                                     | 1                                  | 1                              |
| Macrolide + rifampin + moxifloxacin                        | 0                                  | 1                              |
| M. abscessus complex (n = 8)                               |                                    |                                |
| Macrolide + ceftazidime + amikacin                         | 3                                  | 3                              |
| Macrolide + imipenem + amikacin                            | 2                                  | 0                              |
| M. kansasii (n = 2)                                        |                                    |                                |
| Isoniazid + rifampin + ethambutol                          | 2                                  | 0                              |
| M. xenopi (n = 1)                                          |                                    |                                |
| Macrolide + rifampin + ethambutol                          | 1                                  | 0                              |
| Mixed pathogen (n = 2)                                     |                                    |                                |
| Macrolide + ceftazidime + amikacin                         | 1                                  | 0                              |
| Macrolide + ceftazidime + amikacin + rifampin + ethambutol | 1                                  | 0                              |

**Table S4.** Comparison of the difference in CT score obtained at the treatment initiation and at the treatment termination between recurrent and non-recurrent group

| <b>Differences in CT scores<br/>(CT Score<sub>initiation</sub>- CT Score<sub>termination</sub>)</b> | <b>Non-recurrent<br/>group (n=26)</b> | <b>Recurrent group<br/>(n=18)</b> | <b>p-value*</b> |
|-----------------------------------------------------------------------------------------------------|---------------------------------------|-----------------------------------|-----------------|
| Bronchiectasis (9 points)                                                                           | 0.38 ± 0.80                           | -0.06 ± 0.94                      | 0.176           |
| Cellular bronchiolitis (6 points)                                                                   | 1.62 ± 1.39                           | 1.28 ± 1.13                       | 0.521           |
| Cavity (9 points)                                                                                   | 1.31 ± 1.64                           | 1.33 ± 1.94                       | 0.717           |
| Nodules (3 points)                                                                                  | 0.31 ± 0.55                           | 0.39 ± 0.50                       | 0.663           |
| Consolidation (3 points)                                                                            | 0.69 ± 0.84                           | 0.56 ± 0.71                       | 0.653           |
| Total score (30 points)                                                                             | 4.27 ± 2.78                           | 3.39 ± 3.36                       | 0.442           |

Data are mean value ± standard deviation P-values were obtained using the \*Mann-Whitney test.  
CT, computed tomography

**Table S5.** Comparison of CT score obtained at the treatment initiation and at the treatment termination in patient without recurrent NTM-PD (a) and with recurrent NTM-PD (b).

(a) Patients without NTM-PD recurrence (n=26)

| CT scores                         | At the time of treatment initiation | At the time of treatment termination | p-value*          |
|-----------------------------------|-------------------------------------|--------------------------------------|-------------------|
| Bronchiectasis (9 points)         | 4.69 ± 1.72                         | 4.31 ± 1.62                          | <b>0.025</b>      |
| Cellular bronchiolitis (6 points) | 4.35 ± 1.57                         | 2.73 ± 1.46                          | <b>&lt; 0.001</b> |
| Cavity (9 points)                 | 2.96 ± 3.04                         | 1.65 ± 2.45                          | <b>0.001</b>      |
| Nodules (3 points)                | 0.58 ± 0.50                         | 0.27 ± 0.45                          | <b>0.011</b>      |
| Consolidation (3 points)          | 0.69 ± 0.84                         | 0.04 ± 0.20                          | <b>&lt; 0.001</b> |
| Total score (30 points)           | 13.27 ± 4.21                        | 9.00 ± 3.82                          | <b>&lt; 0.001</b> |

Data are mean value ± standard deviation. Boldface indicates p-values less than 0.05. P-values were obtained using the \* Wilcoxon rank sum test. CT, computed tomography

(b) Patients with NTM-PD recurrence (n=18)

| CT scores                         | At the time of treatment initiation | At the time of treatment termination | p-value*          |
|-----------------------------------|-------------------------------------|--------------------------------------|-------------------|
| Bronchiectasis (9 points)         | 5.50 ± 1.72                         | 5.56 ± 1.54                          | 0.755             |
| Cellular bronchiolitis (6 points) | 4.89 ± 1.49                         | 3.61 ± 1.29                          | <b>0.002</b>      |
| Cavity (9 points)                 | 2.89 ± 2.85                         | 1.56 ± 2.71                          | <b>0.017</b>      |
| Nodules (3 points)                | 1.17 ± 0.86                         | 0.78 ± 0.65                          | <b>0.008</b>      |
| Consolidation (3 points)          | 0.72 ± 0.83                         | 0.17 ± 0.38                          | <b>0.004</b>      |
| Total score (30 points)           | 15.17 ± 4.63                        | 11.72 ± 3.83                         | <b>&lt; 0.001</b> |

\*Data are mean value ± standard deviation. Boldface indicates p-values less than 0.05. P-values were obtained using the \*Wilcoxon rank sum test. CT, computed tomography
